# Supplementary material
Source: PubMed Central journal article supplement (PMC3992656)
Supplement: 1320174111_pnas.201320174SI.pdf [file 1320174111_pnas.201320174SI.pdf]

# Supporting Information

Tietjen et al. 10.1073/pnas.1320174111

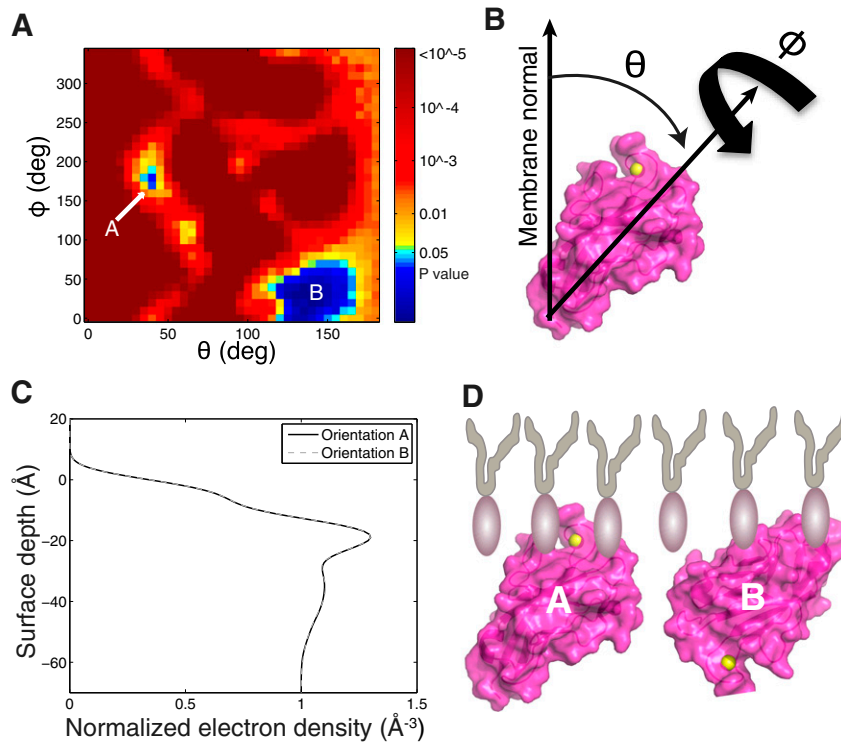

**Fig. S1.** Details of protein orientation fitting. (A) Reduced  $\chi^2$  map depicting two regions of best fit that are indistinguishable based on a  $P$  value  $< 0.05$ , as determined by a statistical  $F$  test comparing best-fit values between different protein orientation models. The characteristic electron density of Tim4 determines the width of the wells and how much the electron density changes under a given rotation. (B) Depiction of the  $\theta$  and  $\phi$  rotational angles used to characterize different protein orientations. X-ray reflectivity is insensitive to in plane rotation (around the membrane normal), so these rotations are ignored. (C) Identical electron density profiles between orientations A and B. (D) Cartoon representations of orientations A and B, with calcium ion shown as yellow spheres.

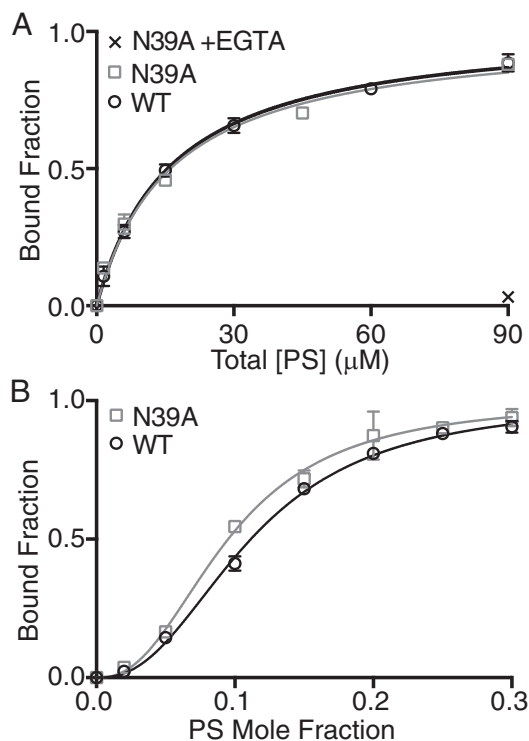

**Fig. S2.** N39 alanine mutant binding data. (A) Lipid vesicle titrations of 7:3 1-palmitoyl-2-oleoyl-sn-glycero-3-phosphocholine (POPC):1-palmitoyl-2-oleoyl-sn-glycero-3-phospho-L-serine (POPS) for N39A mutant (open gray square) relative to wild-type (open black circles). X corresponds to 90  $\mu\text{M}$  [PS] + 10 mM EGTA. Lines through data are fits to a single-site binding model (N39-gray; WT-black). (B) PS mole fraction titrations at 600  $\mu\text{M}$  total lipid with 170 nM N39A mutant (open gray squares) or wild-type (open black circles). Lines through data are fits to a Hill model (N39, gray; wild-type, black). All data points are mean of measurements done at least in triplicate, with error bars depicting 1 SD.

**Table S1.** Parameter values for Tim4 X-ray fitting

| Parameter                                        | 7:3 SOPC:SOPS     | + 1 $\mu\text{M}$ Tim4 |
|--------------------------------------------------|-------------------|------------------------|
| $\theta$ , $^\circ$                              | N/A               | $38 \pm 8$             |
| $\Phi$ , $^\circ$                                | N/A               | $186 \pm 28$           |
| Coverage, %                                      | N/A               | $39.2 \pm 2.5$         |
| Protein position, $\text{\AA}$                   | N/A               | $-11.3 \pm 0.5$        |
| Lipid tail length, $\text{\AA}$                  | $13.4 \pm 0.1$    | $12.9 \pm 0.1$         |
| Lipid head length, $\text{\AA}$                  | $10.5 \pm 0.4$    | $9.7 \pm 0.3$          |
| Lipid tail density, $\text{e}^-/\text{\AA}^{-3}$ | $0.231 \pm 0.004$ | $0.229 \pm 0.003$      |
| Lipid head density, $\text{e}^-/\text{\AA}^{-3}$ | $0.453 \pm 0.004$ | $0.444 \pm 0.003$      |

All errors represents the 95% confidence window for the given parameter with respect to the chosen fit model. SOPC, 1-stearoyl-2-oleoyl-sn-glycero-3-phosphocholine; SOPS, 1-stearoyl-2-oleoyl-sn-glycero-3-phosphoserine.
